# Supplementary material
Source: PubMed Central journal article supplement (PMC1934578)

## Supplemental data

### Supplemental Figure Legends

**Supplemental Figure 1.** Analysis of deletion of AMPK $\alpha$ 2 in POMC and AgRP neurons in control and *POMC $\alpha$ 2KO* and *AgRP $\alpha$ 2KO* mice. (A) Immunofluorescence analysis for AMPK $\alpha$ 2 (green) and POMC (red) expression in the hypothalami of control and *POMC $\alpha$ 2KO* mice. Colocalisation of typical nuclear staining of AMPK $\alpha$ 2 is seen in POMC neurons in control section (indicated by white arrows) and no colocalization is seen in *POMC $\alpha$ 2KO* section. (B) Immunofluorescence analysis for AMPK $\alpha$ 2 (red) and AgRPCreYFP (green) expression in the hypothalami of control and *AgRP $\alpha$ 2KOYFP* mice. Colocalisation of typical nuclear staining of AMPK $\alpha$ 2 is seen in AgRP neurons in control section (indicated by white arrows) and no colocalization is seen in *AgRP $\alpha$ 2KOYFP* section. Confocal images of representative ARC fields are shown and are typical of results from 3 mice of each genotype. Scale bars: 10  $\mu$ m. (C) Quantification of deletion of AMPK $\alpha$ 2 in *POMC $\alpha$ 2KO* and *AgRP $\alpha$ 2KO* neurons. AMPK $\alpha$ 2 staining was assessed in at least 50 POMC or AgRP neurons from 3 mice of each genotype. Results are expressed as percentage of cells in which AMPK $\alpha$ 2 expression was absent and are means  $\pm$  SEM.

**Supplemental Figure 2.** Unaltered neuropeptide release in hypothalamic explants from *POMC $\alpha$ 2KO* and *AgRP $\alpha$ 2KO* mice and normal anterior pituitary hormone gene expression in *POMC $\alpha$ 2KO* mice. (A)  $\alpha$ -MSH release in control and *POMC $\alpha$ 2KO* hypothalamic explants (n = 15 per genotype). (B) AgRP and (C) NPY release in control and *AgRP $\alpha$ 2KO* hypothalamic explants (n = 8 per genotype). (D) Pre-pro-opiomelanocortin (POMC), growth hormone (GH) and thyroid stimulating hormone beta subunit (TSH $\beta$ ) mRNA expression in control and *POMC $\alpha$ 2KO* pituitaries assessed by quantitative RT-PCR, n = 6-10. Probes for GAPDH were used to adjust for total RNA content. All values are mean  $\pm$  SEM.

**Supplemental Figure 3.** Glucose homeostasis in *POMC $\alpha$ 2KO* and *AgRP $\alpha$ 2KO* mice. (A) Glucose tolerance in 12-week old male control and *POMC $\alpha$ 2KO* mice on chow diet,  $n = 16$ . (B) Glucose tolerance in male control and *POMC $\alpha$ 2KO* mice after 18 week exposure to HFD,  $n = 11-15$ . (C) Glucose tolerance in 12-week old male control and *AgRP $\alpha$ 2KO* mice,  $n = 5-7$ . (D) Insulin tolerance in 12-week old male control and *AgRP $\alpha$ 2KO* mice,  $n = 12-20$ . All values are mean  $\pm$  SEM. \*  $P < 0.05$ .

**Supplemental Figure 4.** AgRP neuronal anatomy is normal in *AgRP $\alpha$ 2KO* mice. (A) *In situ* hybridization for *AgRP* mRNA in ARC of control and *AgRP $\alpha$ 2KO* mice. Representative sections from 3 mice for each genotype are shown. (B) Immunoreactivity for AgRP in ARC of control and *AgRP $\alpha$ 2KO* mice. Representative sections from 3 mice for each genotype are presented. Population size and distribution (C and D) for AgRP neurons within the ARC in control and *AgRP $\alpha$ 2KO* mice ( $n = 2-3$ ). AgRP somatic area (E) and diameter (F) in control and *AgRP $\alpha$ 2KO* mice. A minimum of 100 neurons were analysed per group. 3V, 3<sup>rd</sup> ventricle. Scale bars, 50  $\mu$ m. All values are mean  $\pm$  SEM.

**Supplemental Table 1.** Body length, bone mineral content and biochemical parameters in *AMPK $\alpha$ 2* mutant mice.

|                                              | Control              | <i>POMC<math>\alpha</math>2KO</i> | <i><math>\alpha</math>1HetPOMC<math>\alpha</math>2KO</i> | Control              | <i>AgRP<math>\alpha</math>2KO</i> |
|----------------------------------------------|----------------------|-----------------------------------|----------------------------------------------------------|----------------------|-----------------------------------|
| Nose/anus length (cm)                        | 9.4 ± 0.1<br>(8)     | 9.4 ± 0.1<br>(8)                  | 9.6 ± 0.1<br>(8)                                         | 9.3 ± 0.2<br>(7)     | 9.1 ± 0.3<br>(8)                  |
| Bone mineral content<br>(g/cm <sup>2</sup> ) | 0.051 ±<br>0.001 (8) | 0.054 ±<br>0.001 (8)              | 0.053 ±<br>0.001 (8)                                     | ND                   | ND                                |
| Randomly fed blood<br>glucose (mmol/l)       | 8.1 ± 0.2<br>(27)    | 8.2 ± 0.2<br>(25)                 | 8.1 ± 0.4<br>(12)                                        | 6.8 ± 0.2<br>(15)    | 6.8 ± 0.2<br>(14)                 |
| Fasted blood glucose<br>(mmol/l)             | 5.7 ± 0.3<br>(24)    | 5.8 ± 0.5<br>(23)                 | 5.3 ± 0.4<br>(18)                                        | 4.7 ± 0.2<br>(16)    | 4.3 ± 0.2<br>(17)                 |
| Insulin (ng/ml)                              | 0.149 ±<br>0.015 (7) | 0.173 ±<br>0.052 (7)              | ND                                                       | 0.155 ±<br>0.019 (7) | 0.186 ±<br>0.019 (7)              |
| Adiponectin (µg/ml)                          | 4.8 ± 0.6<br>(6)     | 4.5 ± 0.6<br>(7)                  | ND                                                       | 4.0 ± 0.5<br>(7)     | 3.1 ± 0.3<br>(7)                  |
| Corticosterone (ng/ml)                       | 11.1 ± 1.9<br>(6)    | 9.2 ± 1.9<br>(7)                  | ND                                                       | ND                   | ND                                |
| T4 (µg/dl)                                   | 6.1 ± 0.3<br>(6)     | 6.3 ± 0.7<br>(7)                  | ND                                                       | 3.4 ± 0.2<br>(6)     | 3.6 ± 0.3<br>(7)                  |

Data are expressed as mean ± SEM. The number of mice per group is shown in parenthesis. ND, not determined.

**Supplemental Table 2.** The biophysical properties of ARC AgRP-expressing neurons in control and *AgRP $\alpha$ 2KO* mice.

|                                | Control            | AgRP $\alpha$ 2KO  |
|--------------------------------|--------------------|--------------------|
| Membrane potential (mV)        | -46 $\pm$ 1 (26)   | -51 $\pm$ 1 (19)*  |
| Input resistance (G $\Omega$ ) | 2.5 $\pm$ 0.3 (23) | 2.8 $\pm$ 0.3 (17) |
| Spike firing frequency (Hz)    | 2.1 $\pm$ 0.4 (26) | 2.8 $\pm$ 0.5 (19) |

Data are expressed as mean  $\pm$  SEM. The number of neurons per group is shown in parenthesis. \*  $P < 0.05$ .

# Supplemental Figure 1

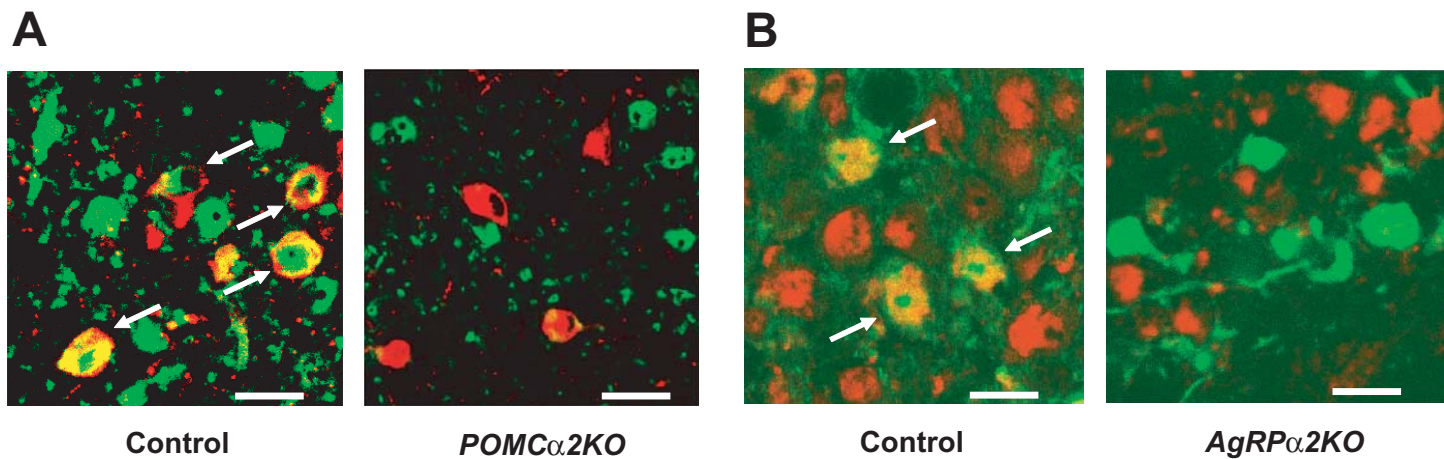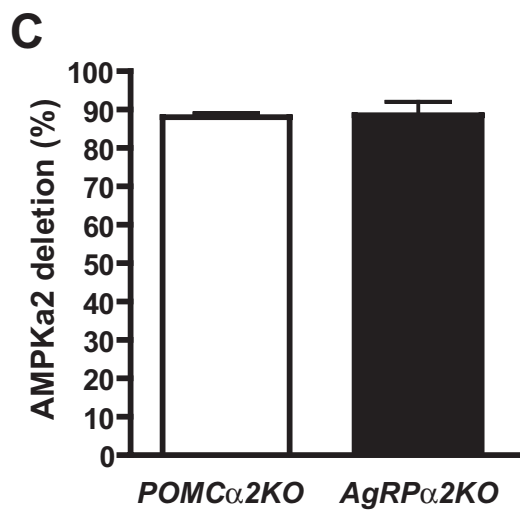

## Supplemental Figure 2

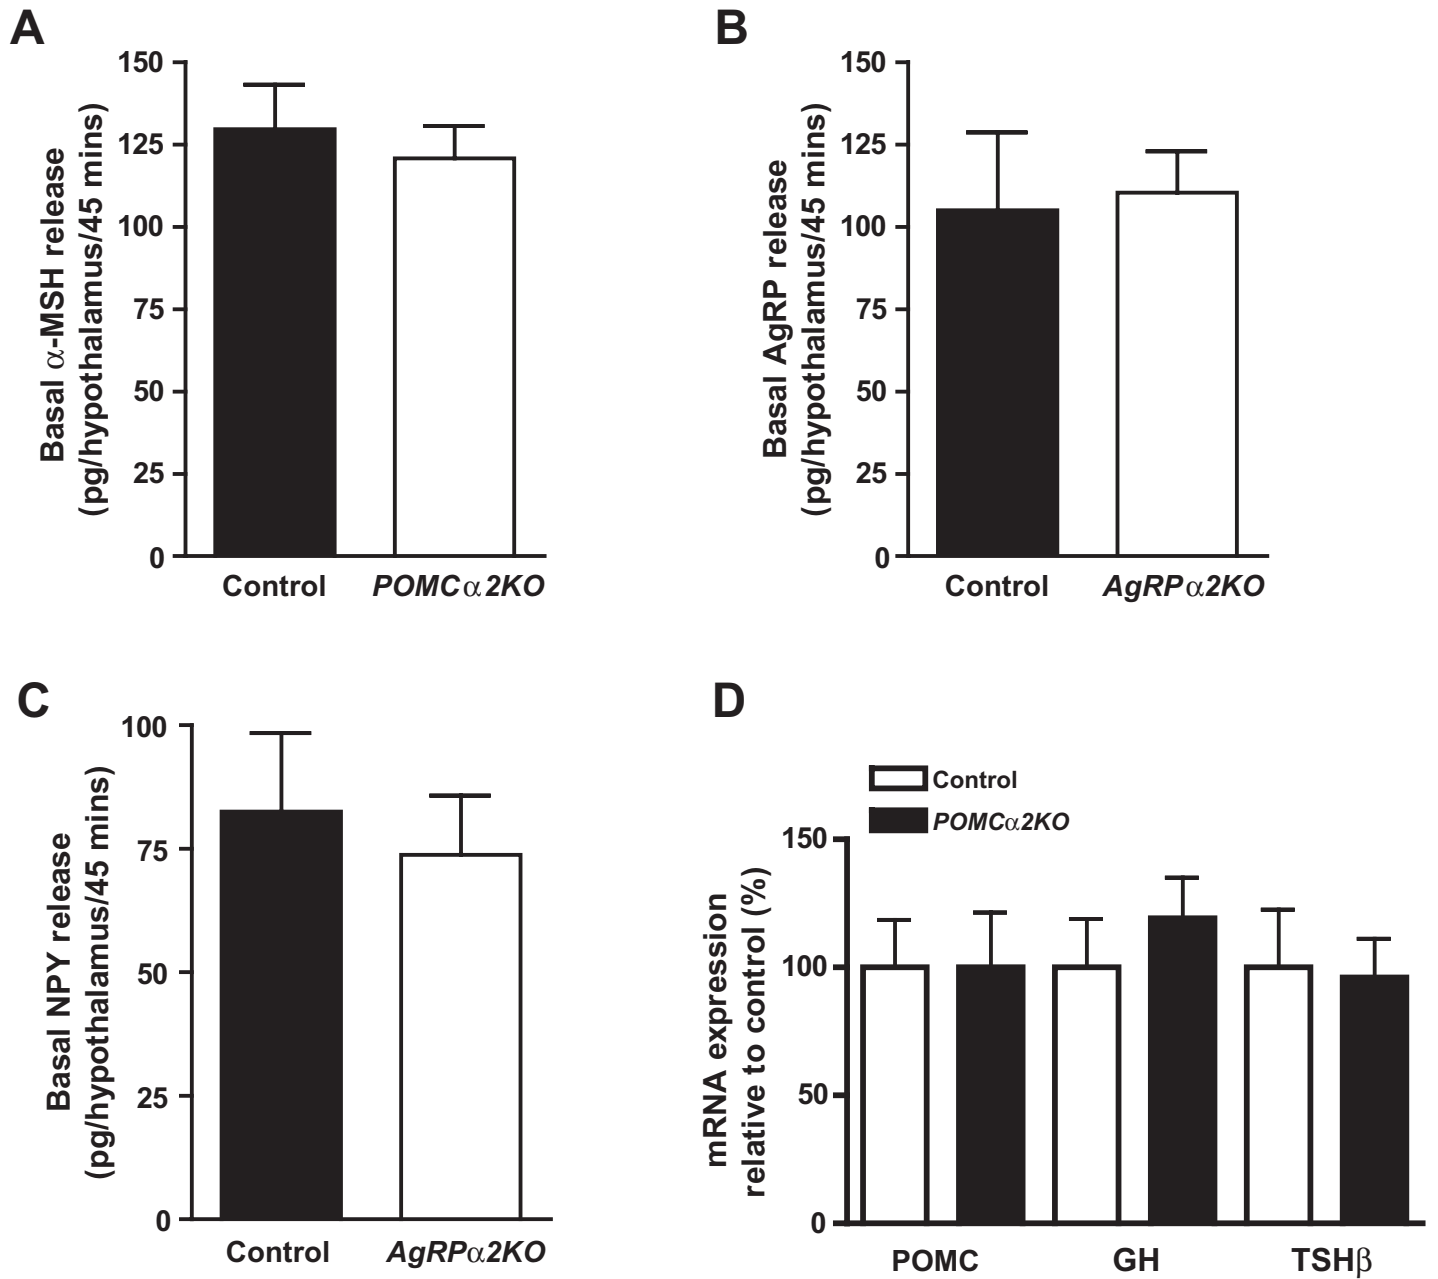

# Supplemental Figure 3

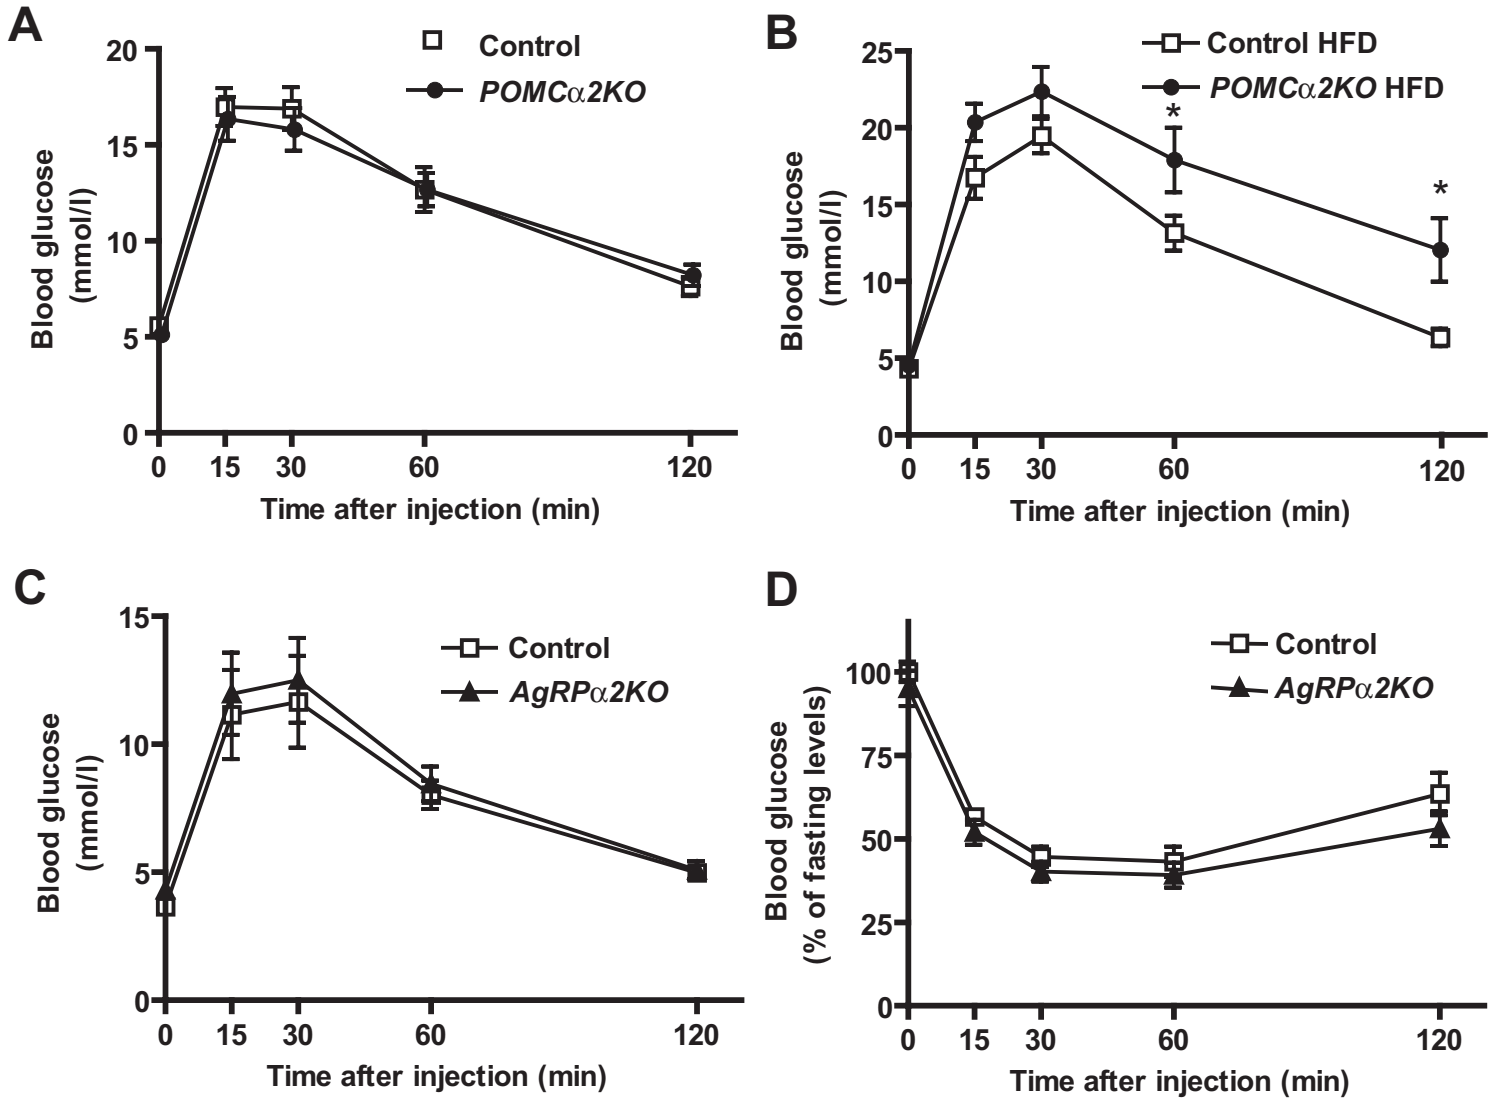

# Supplemental Figure 4

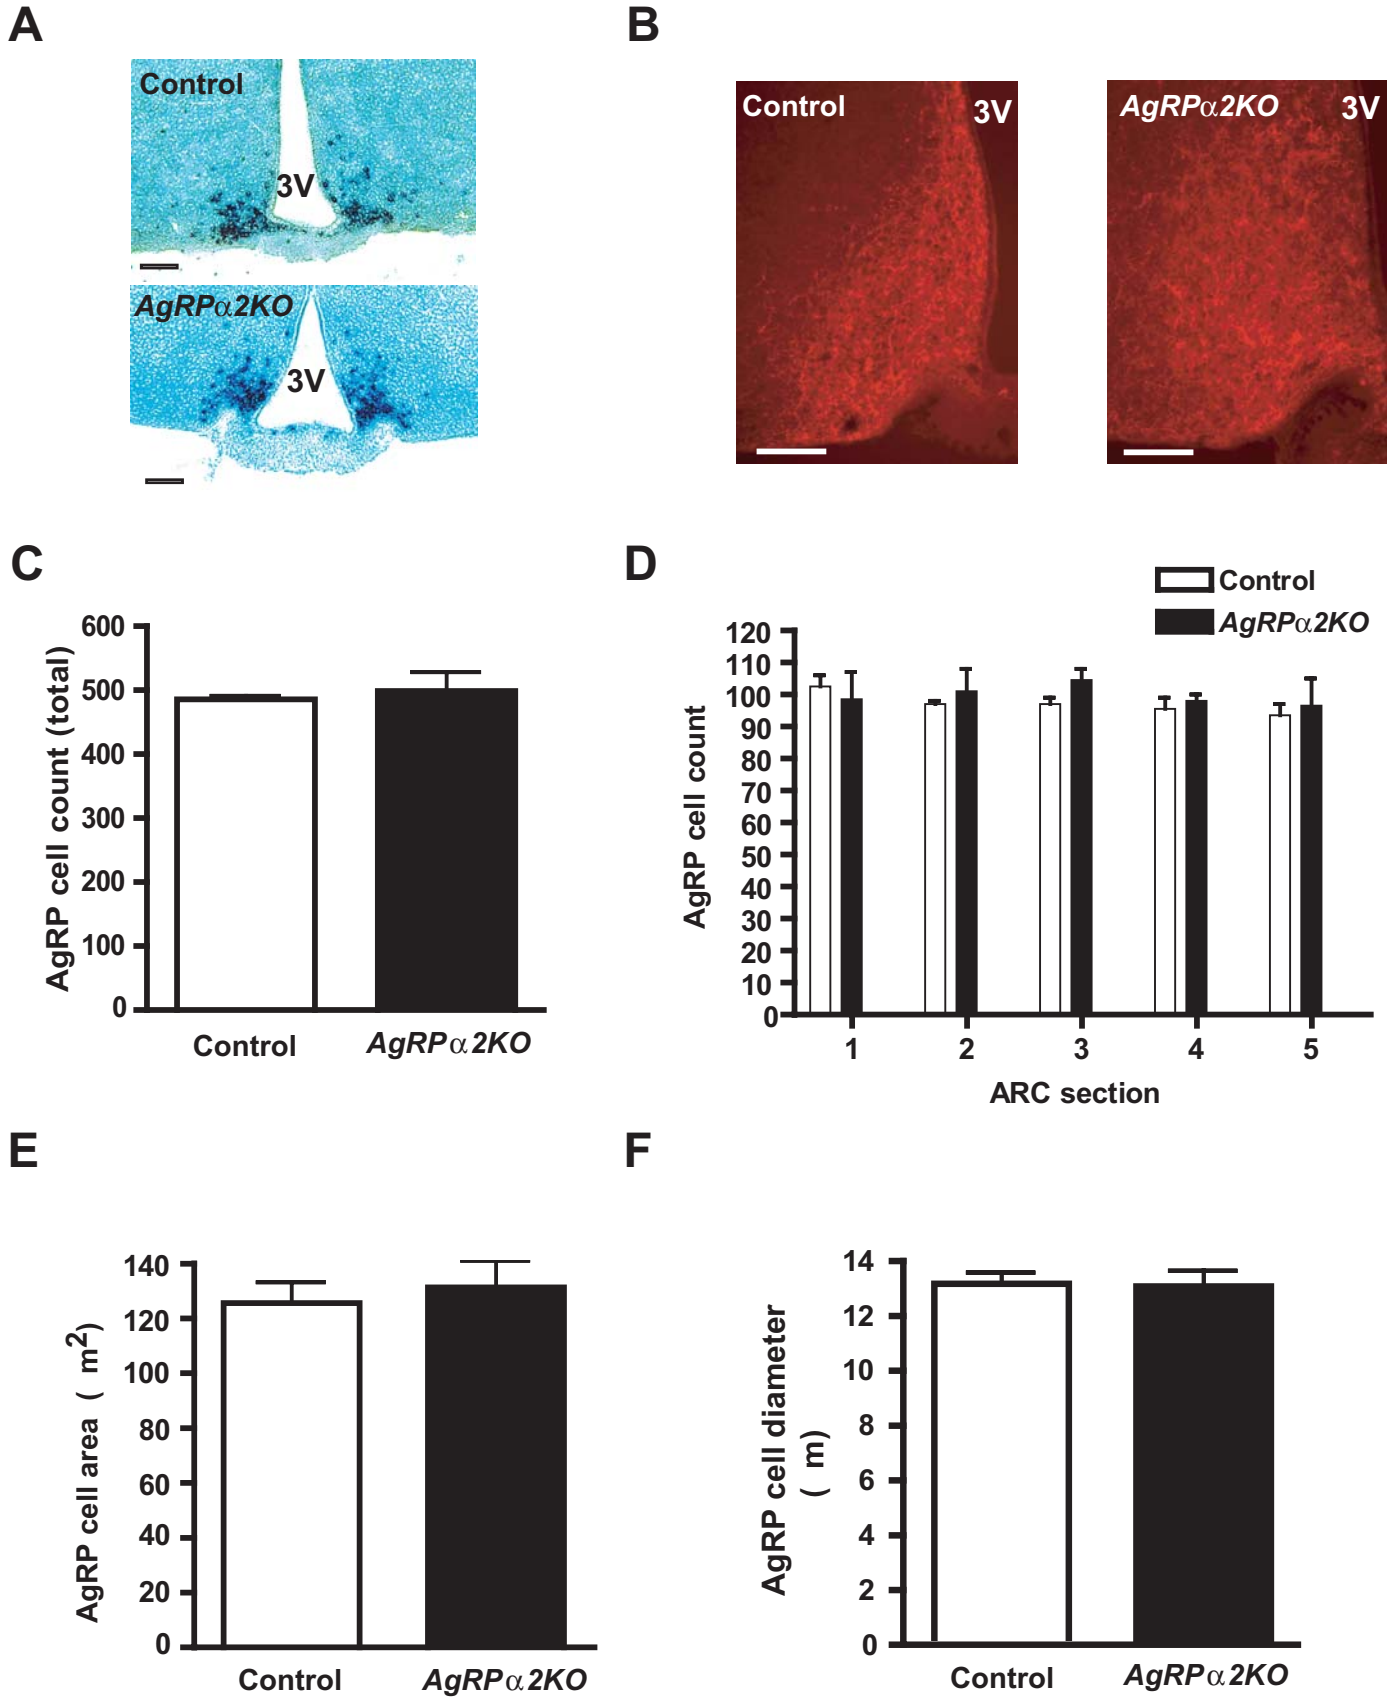

Supplement: JCI0731516sd.pdf [file JCI0731516sd.pdf]
